# Supplementary material for: Why validation is not enough: Setting the scene for the implementation of the Kimberley Mum’s Mood Scale
Source: PLOS journal article supplement (doi:10.1371/journal.pone.0234346), 2020-06-12
Supplement: S2 (10.1371/journal.pone.0234346.s002) [file journal.pone.0234346.s002]

PLOS One


Skip to main content

Advertisement

- plos.org
- Create account
- Sign in

- - Publish
  - About
  - Browse
- Searchadvanced search
- Browse Topics

Browse Subject Areas

?

Click through the PLOS taxonomy to find articles in your field.

For more information about PLOS Subject Areas, click
here.

February 11, 2025

# We believe in a better future where science is open to all, for all.

Image credit: PLOS One

### Calling all experts!

#### PLOS One is seeking talented individuals to join our editorial board.

APPLY NOW

05/21/2025

Machine Learning

## Time-series visual representations for sleep stages classification

Padovani Ederli and colleagues show visual representations of sleep classification data based on smartwatch data surpass traditional methods that often are reliant on raw data or extracted features, alongside artificial intelligence methods.

Image credit: Smart watch by fancycrave1, Pixabay

05/14/2025

Communication

## Characterisation of facial expressions and behaviours of horses in response to positive and negative emotional anticipation using network analysis

Phelipon and colleagues reveal distinct facial expression profiles indicating positive and negative emotional valence in horses.

Image credit: Horses by Wolfgang Claussen, Pixabay

05/19/2025

Cancer

## Exploring fertility preservation in AYA cancer survivors: Information needs and post-cancer challenges

Vialle and colleagues explore the experiences of fertility preservation and cancer-induced infertility among adolescent and young adult cancer survivors, diving into the different provisions, gender specific challenges, and the results post-treatment. This work highlights a need to develop specific information resources for AYA cancer survivors.

Image credit: Cute little shoes and x ray photo by Freepik, Freepik

05/14/2025

Archeology

## From the jaws of the “Leviathan”: A sperm whale tooth from the Valencina Copper Age Megasite

Ramírez-Cruzado Aguilar-Galindo and colleagues report the finding of a sperm-whale tooth in a Copper Age site in Spain.

Image credit: Fig 2 by Ramírez-Cruzado Aguilar-Galindo et al., CC BY 4.0

05/19/2025

EveryOne

## Editor Spotlight: Rachid Bouharroud

In this interview, PLOS One Academic Editor Rachid Bouharroud discusses the varied benefits of his role as an Academic Editor with PLOS, exciting new developments in his research, and provides three top tips for early-career researchers.

Image credit: Dr. Rachid Bouharroud by Dr. Rachid Bouharroud, CC BY 4.0

05/14/2025

The Official PLOS Blog

## Updated version of the “How Equitable Is It?” tool for assessing equity in scholarly communication models

PLOS, cOAlition S and Jisc issued this press release regarding the official launch of the "How Equitable Is It?" tool in its updated version following a comprehensive review of community feedback.

Image credit: Ball by PLOS, CC BY 4.0

04/14/2025

EveryOne

## Editor Spotlight: Eleni Petkari

In this interview, PLOS One Academic Editor Eleni Petkari shares her inspirations, her experience working across multiple countries and the insights this provided regarding different attitudes towards mental health, and her experience collaborating with PLOS One as an Academic Editor.

Image credit: Eleni Petkari by Eleni Petkari, CC BY 4.0

05/20/2025

Health Literacy

## Association of health literacy with quality of life and health outcomes among school-age children in Japan: A cross-sectional study

Ninohei and colleagues report the impact of family health literacy.

Image credit: Classroom by WOKANDAPIX f, Pixabay

05/27/2025

Ecology

## Functional safeguards for conservation: Identifying climate change refugia for frugivorous and nectarivorous birds in a degraded area of Colombia

Sáenz-Jiménez and colleagues report how climate change affects the distribution of birds in Colombia.

Image credit: Fig 6 by Sáenz-Jiménez et al., CC BY 4.0

05/16/2025

Material Science

## Can laboratory-based XAFS compete with XRD and Mössbauer spectroscopy as a tool for quantitative species analysis? Critical evaluation using the example of a natural iron ore

Praetz and colleagues show lab-XAFS is suited for routine analytics.

Image credit: Mineral by György Károly Tóth, Pixabay

05/14/2025

Education

## Effective remediation programs for vulnerable students to overcome learning loss

Jacobs and colleagues investigate the effectiveness of learning remediation programs addressing COVID-19 related learning loss in Dutch primary school settings.

Image credit: School by Kohji Asakawa, Pixabay

Collections

- ### Aging in Human Health and Disease

  In this collection, PLOS One highlights multidisciplinary research in the area of aging.
- ### Complex Systems in Healthcare

  This joint collection of PLOS One and PLOS Complex Systems articles focuses on the use of complex systems research in the healthcare context.
- ### Collections

  Browse the lastest collections of papers from across PLOS.

1   of   3

Meet our staff at conferences

- ### One Ocean Science Congress 2025

  Senior Editor Miquel Vall-Ilosera Camps will be representing PLOS One at this conference in Nice, France, June 3rd-6th 2025.
- ### 30th Annual Conference of the European Association of Environmental and Resource Economists

  Associate Editor Annesha Sil will be representing PLOS One at this conference in Bergen, Norway, June 16th-19th 2025.
- ### 7th International Conference on Statistics: Theory and Applications

  Associate Editor Joanna Tindall will be representing PLOS One at this conference in Paris, France, August 17th-19th 2025.

1   of   3

### Publish with PLOS

- Submission Instructions
- Submit Your Manuscript

EveryONE

See All Blogs

### Connect with Us

- Contact Us
- RSS
- PLOS One on Bluesky
- PLOS on Facebook
- PLOS Blogs

## Get new content from PLOS One in your inbox

PLOS will use your email address to provide content from PLOS One.
You can find out more about how PLOS processes your data by reading our
Privacy Policy.
You can unsubscribe at any time by clicking the unsubscribe link in our emails or by contacting us at privacy@plos.org.

PLOS One | ISSN: 1932-6203 (online)


- Publications
- PLOS Biology
- PLOS Climate
- PLOS Complex Systems
- PLOS Computational Biology
- PLOS Digital Health
- PLOS Genetics
- PLOS Global Public Health

- PLOS Medicine
- PLOS Mental Health
- PLOS Neglected Tropical Diseases
- PLOS One
- PLOS Pathogens
- PLOS Sustainability and Transformation
- PLOS Water

- Home
- Blogs
- Collections
- Give feedback
- LOCKSS

- Privacy Policy
- Terms of Use
- Advertise
- Media Inquiries
- Contact

PLOS is a nonprofit 501(c)(3) corporation, #C2354500, based in California, US

### Cookie Preference Center

Our website uses different types of cookies. Optional cookies will only be set with your consent and you may withdraw this consent at any time. Below you can learn more about the types of cookies PLOS uses and register your cookie preferences.

Accept All Cookies

### Customize Your Cookie Preference

+**Strictly Necessary**

Always On

+**Functional**

OnOff

+**Performance and Analytics**

OnOff

+**Marketing**

OnOff

Save Selected Preferences and Close

For more information about the cookies and other technologies used by us, please read our Cookie Policy.
