# Supplementary material for: Why validation is not enough: Setting the scene for the implementation of the Kimberley Mum’s Mood Scale
Source: PLOS journal article supplement (doi:10.1371/journal.pone.0234346), 2020-06-12
Supplement: S2 (10.1371/journal.pone.0234346.s002) [file journal.pone.0234346.s002]

## Survey Questions and Qualitative Interview guide

| Theme                                                                            | Sample Frame A (Health professionals) Survey                                                                                                                                                                     | Sample Frame A (Health professionals) Depth Interview Schedule                                                                                                                                                            | Sample Frame B (Aboriginal women) Depth Interview Schedule                                                                                                                                                                                                                                                         |
|----------------------------------------------------------------------------------|------------------------------------------------------------------------------------------------------------------------------------------------------------------------------------------------------------------|---------------------------------------------------------------------------------------------------------------------------------------------------------------------------------------------------------------------------|--------------------------------------------------------------------------------------------------------------------------------------------------------------------------------------------------------------------------------------------------------------------------------------------------------------------|
| Perceptions of postnatal depression and anxiety/<br>perceptions of prevalence    |                                                                                                                                                                                                                  | Do you feel perinatal mental health is a significant issue for your patients?                                                                                                                                             | <p>What do these terms mean to you?</p> <p>How do you talk about depression and anxiety in your family community?</p> <p>What triggers depression and/or anxiety?</p> <p>What supports people to have good wellbeing?</p> <p>Have you experienced perinatal depression and/or anxiety or know someone who has?</p> |
| KMMS use                                                                         | <p>Do you use the KMMS to screen for depression and anxiety during the perinatal period?</p> <p>How many times have you used the KMMS 0-1010-2020 +</p>                                                          | <p>Do you use the KMMS to screen for depression and anxiety during the perinatal period?</p> <p>How many times have you used the KMMS;</p> <p>Are you using Part 1 and Part 2?</p>                                        | Have you received the KMMS in your own perinatal care?                                                                                                                                                                                                                                                             |
| Efficacy and appropriateness of perinatal depression and anxiety screening tools | <p>Are there times when you have used the Edinburgh Perinatal Depression Scale instead of the KMMS? Can you explain the reasons why?</p> <p>What are the barriers and enablers to using the KMMS with women?</p> | <p>Are there times when you have used the Edinburgh Perinatal Depression Screening tool instead of the KMMS? Can you explain the reasons why?</p> <p>What are the barriers and enablers to using the KMMS with women?</p> | <p>Looking at part one of the KMMS. Can you tell me about your thoughts on the tool?</p> <p>Do the questions make sense to you / are they appropriate</p> <p>Can you tell me about the language in the screening tool, is it right?</p>                                                                            |

|                            |                                                                                                                                                                                |                                                                                                                                                                                                                                                                              |                                                                                                                                                                                                                                                                                                                                                                                                                                                                                                                          |
|----------------------------|--------------------------------------------------------------------------------------------------------------------------------------------------------------------------------|------------------------------------------------------------------------------------------------------------------------------------------------------------------------------------------------------------------------------------------------------------------------------|--------------------------------------------------------------------------------------------------------------------------------------------------------------------------------------------------------------------------------------------------------------------------------------------------------------------------------------------------------------------------------------------------------------------------------------------------------------------------------------------------------------------------|
|                            |                                                                                                                                                                                |                                                                                                                                                                                                                                                                              | <p>Can you tell me about the use of pictures/ graphics in Part 1.</p> <p>Can you talk to me about the different domains listed in Part 2.</p> <p>The last bit of the KMMS is about deciding on a woman's follow up actions or next steps- what types of support would be important for you or the women you know?</p> <p>Having a look at the EPDS what are some of your views about that screening tool?</p> <p>What would be the key barriers for women, such as yourself, engaging in the KMMS screening process?</p> |
| Administration of the KMMS | <p>How often do you use the KMMS during the perinatal period?</p> <p>Are you using it according to the EPDS schedule, more or less? Please tell me a bit about your answer</p> | <p>How often do you use the KMMS during the perinatal period?</p> <p>Are you using it according to the EPDS schedule, more or less? Please tell me a bit about your answer.</p> <p>Please describe how you monitor the KMMS support/ follow up actions with the patient?</p> | <p>Who do you think would be the ideal clinician to take you through the KMMS? Why is this position the right one for administering the tool?</p> <p>When, where, how often should the KMMS be administered?</p>                                                                                                                                                                                                                                                                                                         |

|                                                                   |                                                                                                                                        |                                                                                                                                         |                                                                                                                                                                                                    |
|-------------------------------------------------------------------|----------------------------------------------------------------------------------------------------------------------------------------|-----------------------------------------------------------------------------------------------------------------------------------------|----------------------------------------------------------------------------------------------------------------------------------------------------------------------------------------------------|
| Cultural security/<br>appropriate                                 | In your experience do patients<br>respond well to using the KMMS?<br>Please explain your answer.                                       |                                                                                                                                         | Is it important for you to have<br>culturally secure screening tools?<br><br>Do you think the KMMS is a culturally<br>secure tool?<br><br>What makes you say it is or is not<br>culturally secure? |
| Support for<br>implementation of<br>the KMMS across<br>the region | Are you supportive of the KMMS<br>being implemented as standard<br>practise across the region? Can you<br>explain the reasons for this | Are you supportive of the KMMS<br>being implemented as standard<br>practise across the region? Can<br>you explain the reasons for this? | Do you support the implementation<br>of the KMMS as the preferred<br>screening tool for all Aboriginal<br>women in the Kimberley?                                                                  |
| Training                                                          |                                                                                                                                        | Do you feel confident using the<br>KMMS?<br>What are your training and<br>support recommendations                                       |                                                                                                                                                                                                    |
| KMMS<br>improvements                                              | What improvements or changes<br>would you make to the KMMS or<br>how it is used?                                                       | What improvement or changes would<br>you suggest?<br>How can we better improve integration<br>of the KMMS within clinical practise?     | What improvements or changes<br>would you make to the KMMS or how<br>it is used?                                                                                                                   |
| Staff role/ time in<br>the Kimberley                              | How long have you been working for<br>a Kimberley based Health Service and<br>what is your current role?                               | How long have you been working for a<br>Kimberley based Health Service and<br>what is your current role                                 |                                                                                                                                                                                                    |
